# Supplementary figures and images for: Cytosine Methylation Profiles as a Molecular Marker in Non–Small Cell Lung Cancer
Source: Oxford University Press journal article supplement (doi:10.1158/0008-5472.can-06-0400), 2006-11-15

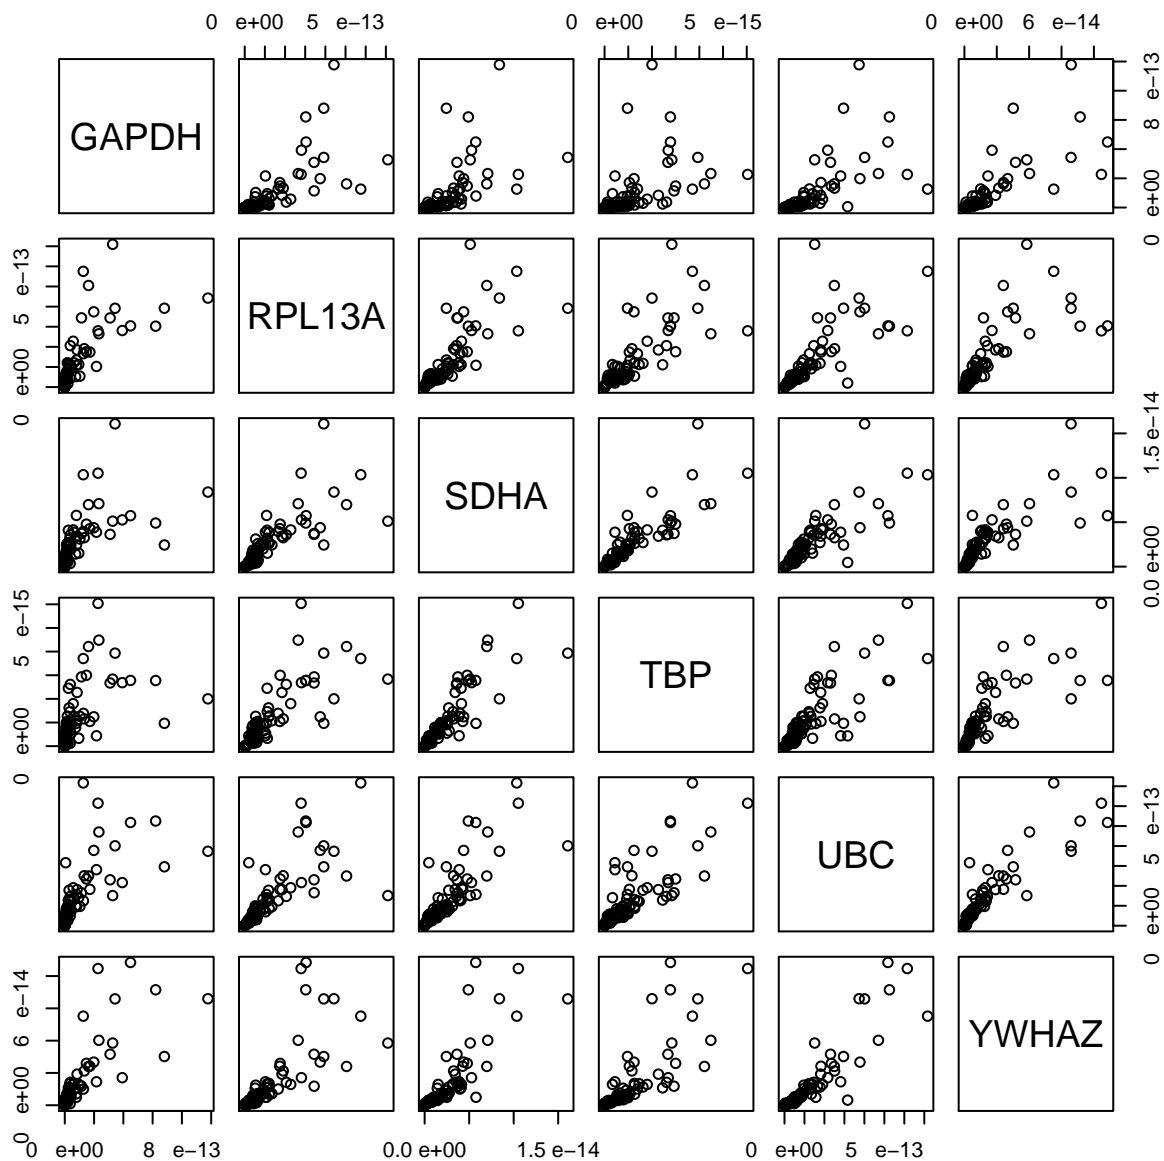

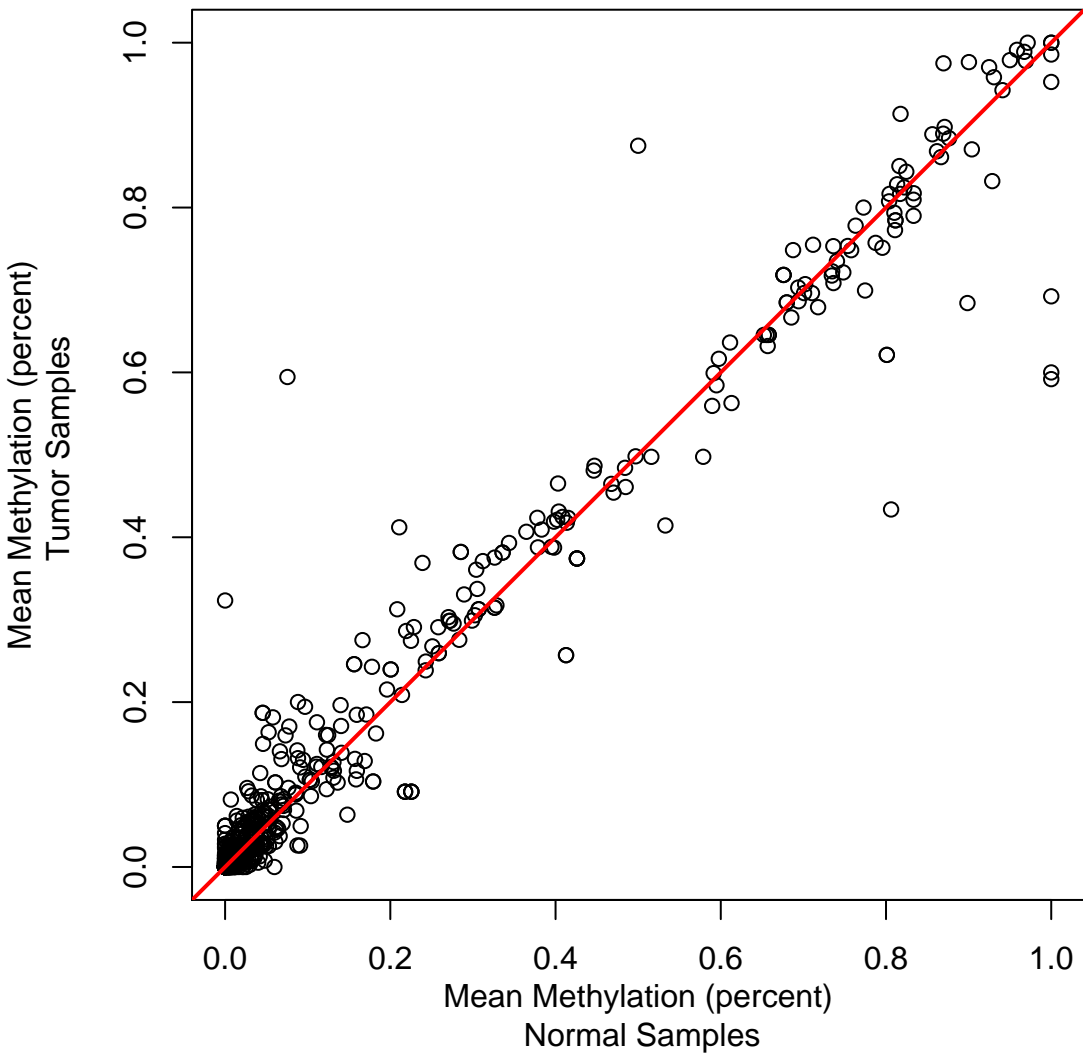

# Dendrogram for Survival Analysis

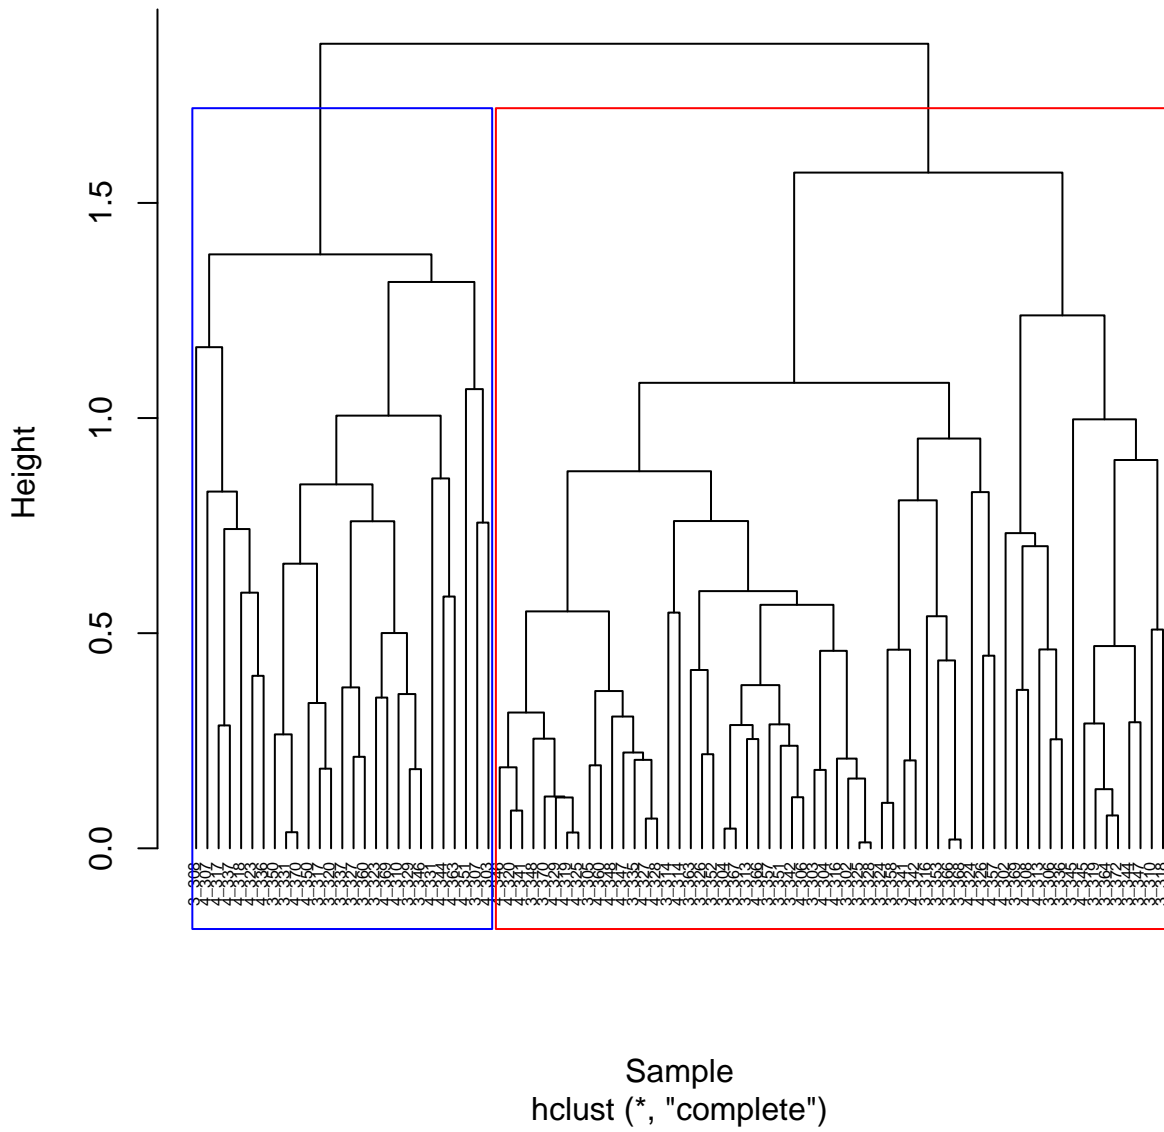

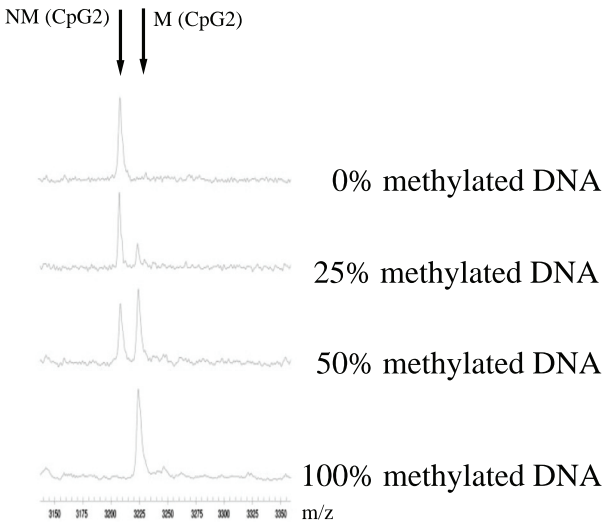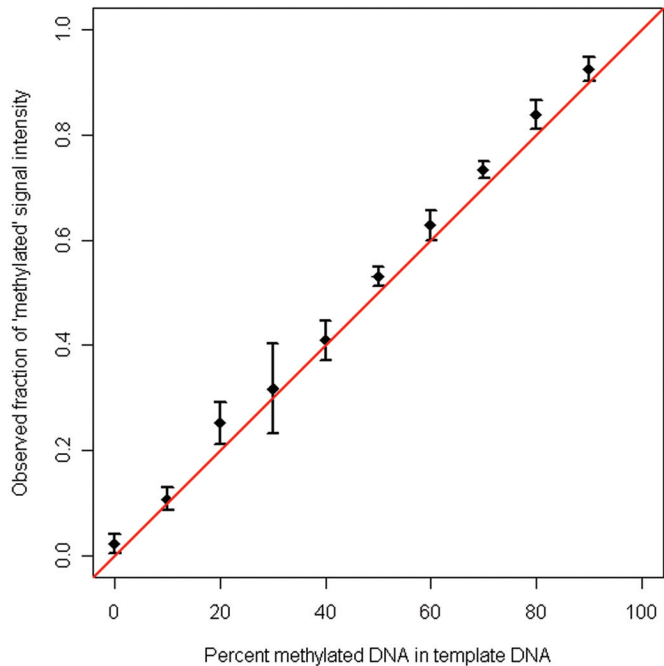

Supplement: 00085472can060400-sup-supplementary_figures.pdf [file 00085472can060400-sup-supplementary_figures.pdf]
